# Supplementary material for: Clinical and mutational profiles of adult medulloblastoma groups
Source: Springer Nature journal article supplement (doi:10.1186/s40478-020-01066-6), 2020-11-10

**Supplementary Figure 1.** Expression heatmap of 22 medulloblastoma group-specific genes in the NanoString CodeSet across a cohort of 99 adult medulloblastomas

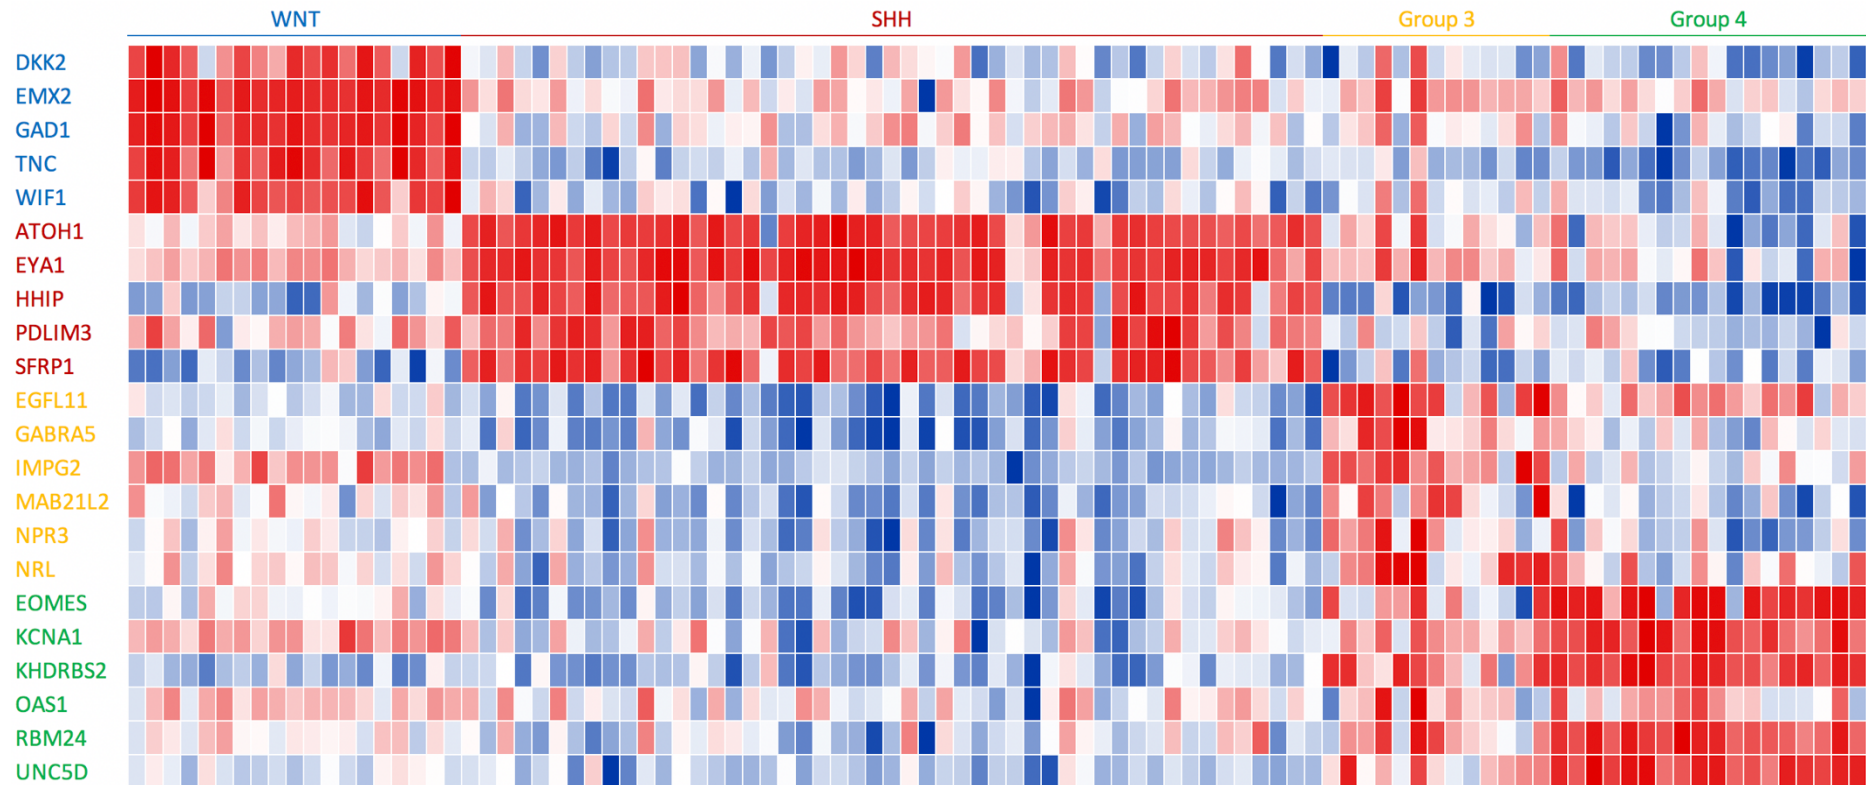

**Supplementary Figure 2.** Kaplan-Meier survival curves (OS) of adult medulloblastoma patients **(a)**, stratified by **(b)** age group, **(c)** sex, **(d)** location, **(e)** metastasis, **(f)** histological type, **(g)** resection extent and **(h)** adjuvant therapy

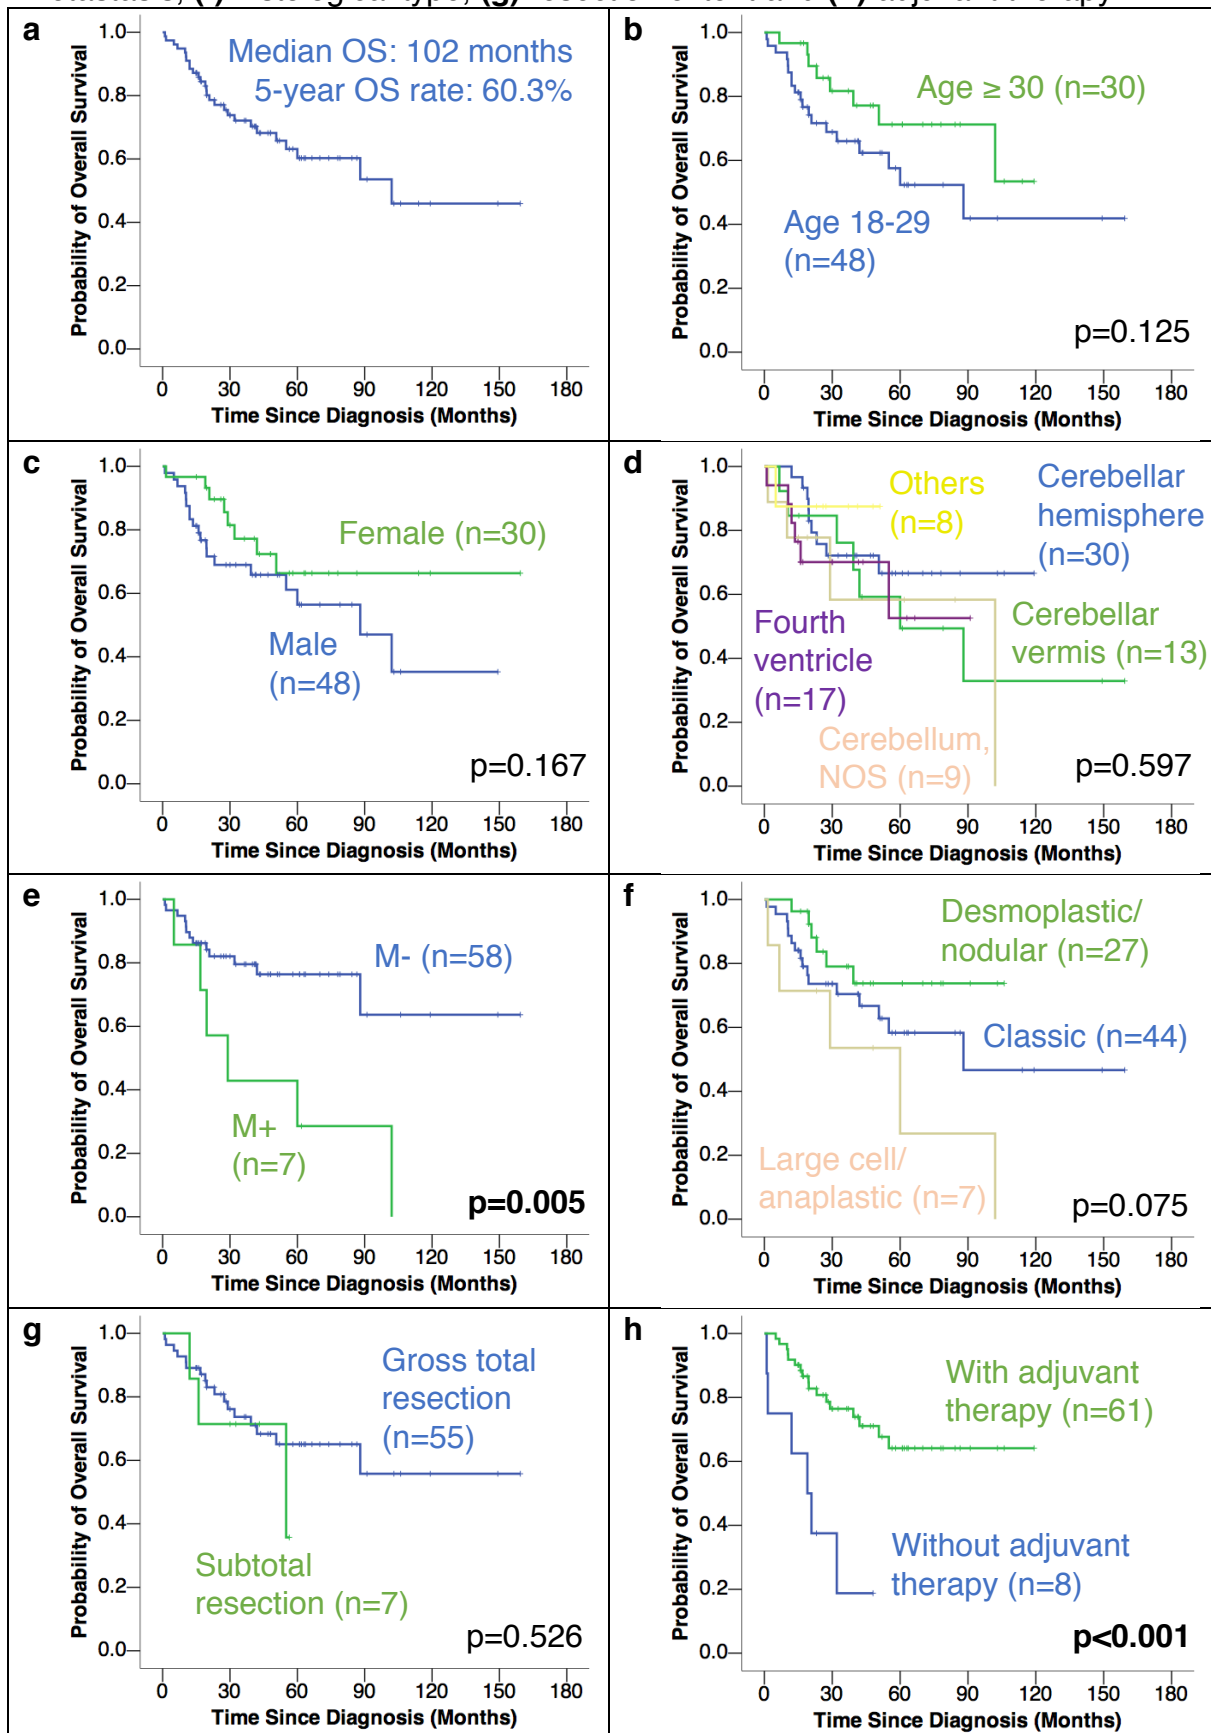



**Supplementary Figure 3. H&E photomicrographs of adult Group 3 medulloblastomas**

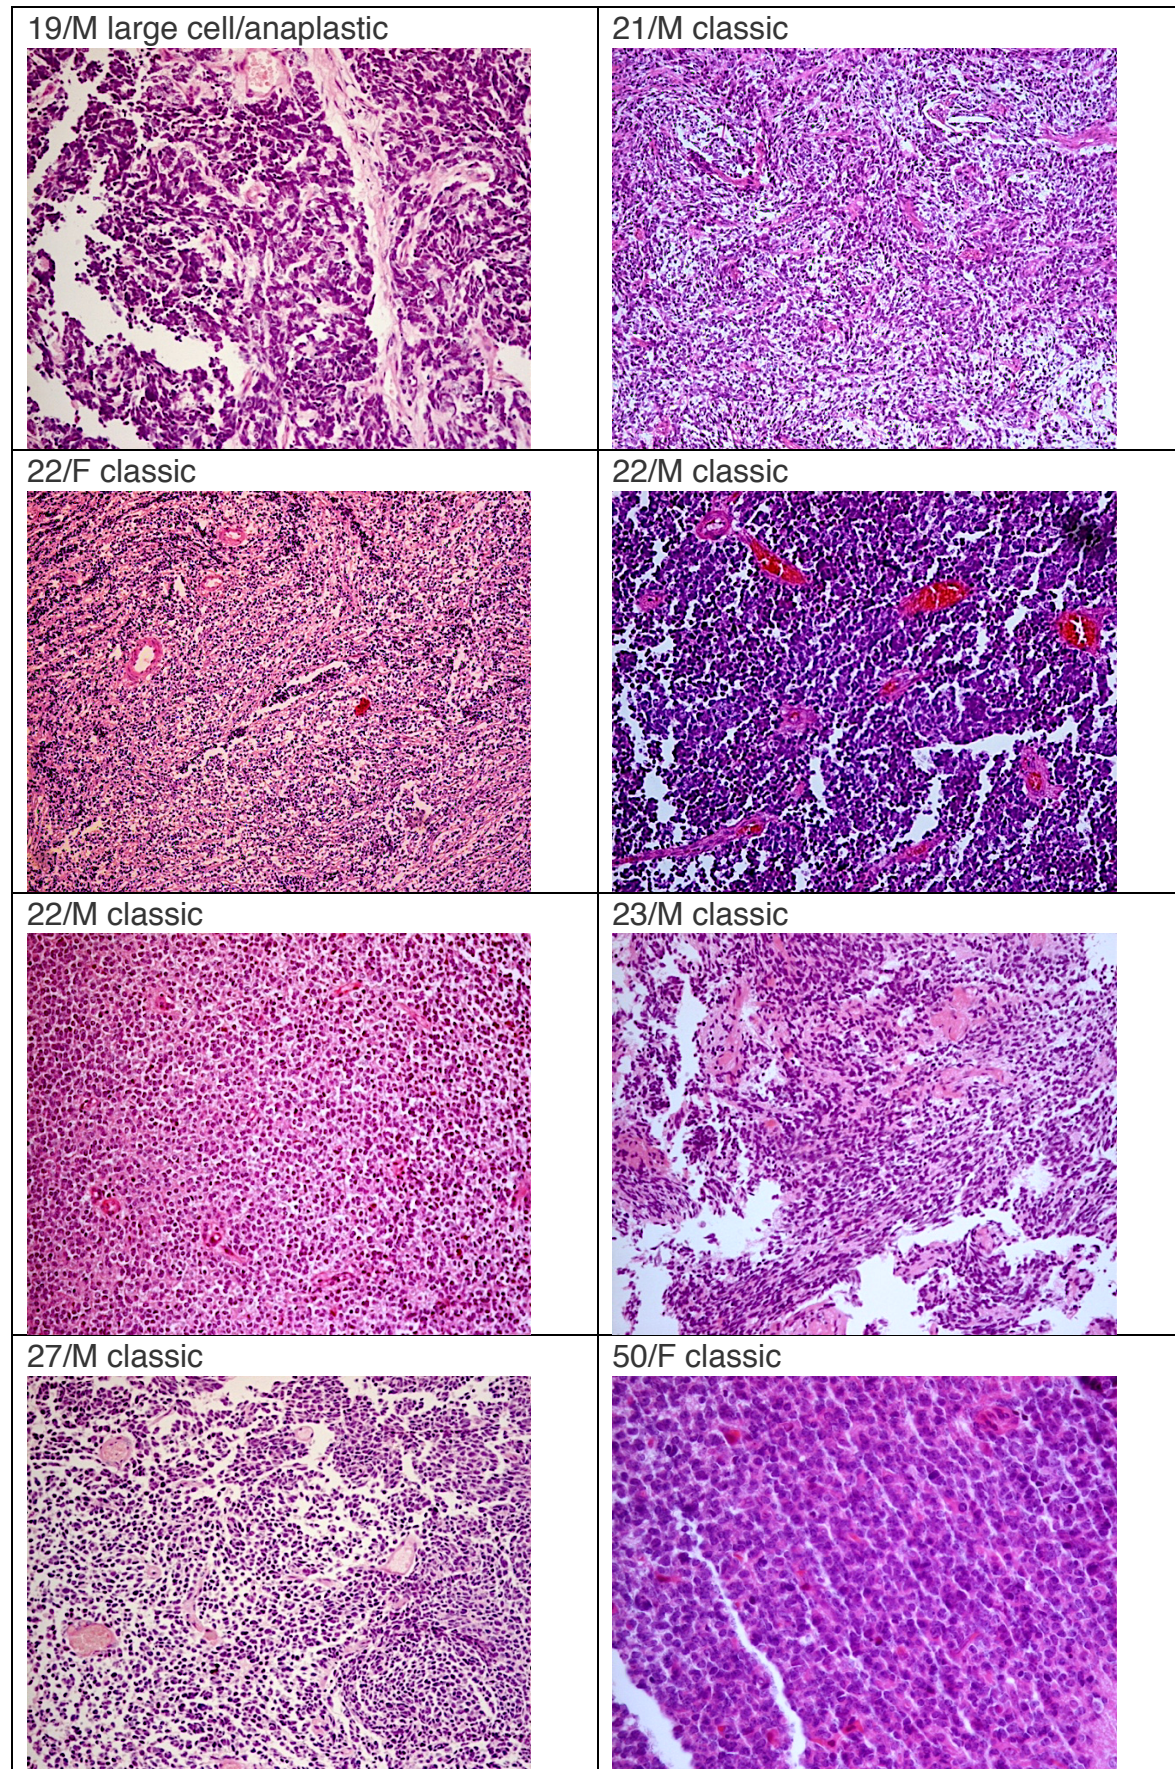



**Supplementary Figure 4.** Gene-level summary plots of mutations in (a) CTNNB1, (b) APC, (c) TP53, (d) DDX3X, (e) FBXW7, (f) PTCH1, (g) SMO, (h) KBTBD4, (i) NOTCH1 and (j) TCF4. Green, missense mutations; Brown: in-frame mutations; Black: truncating mutations

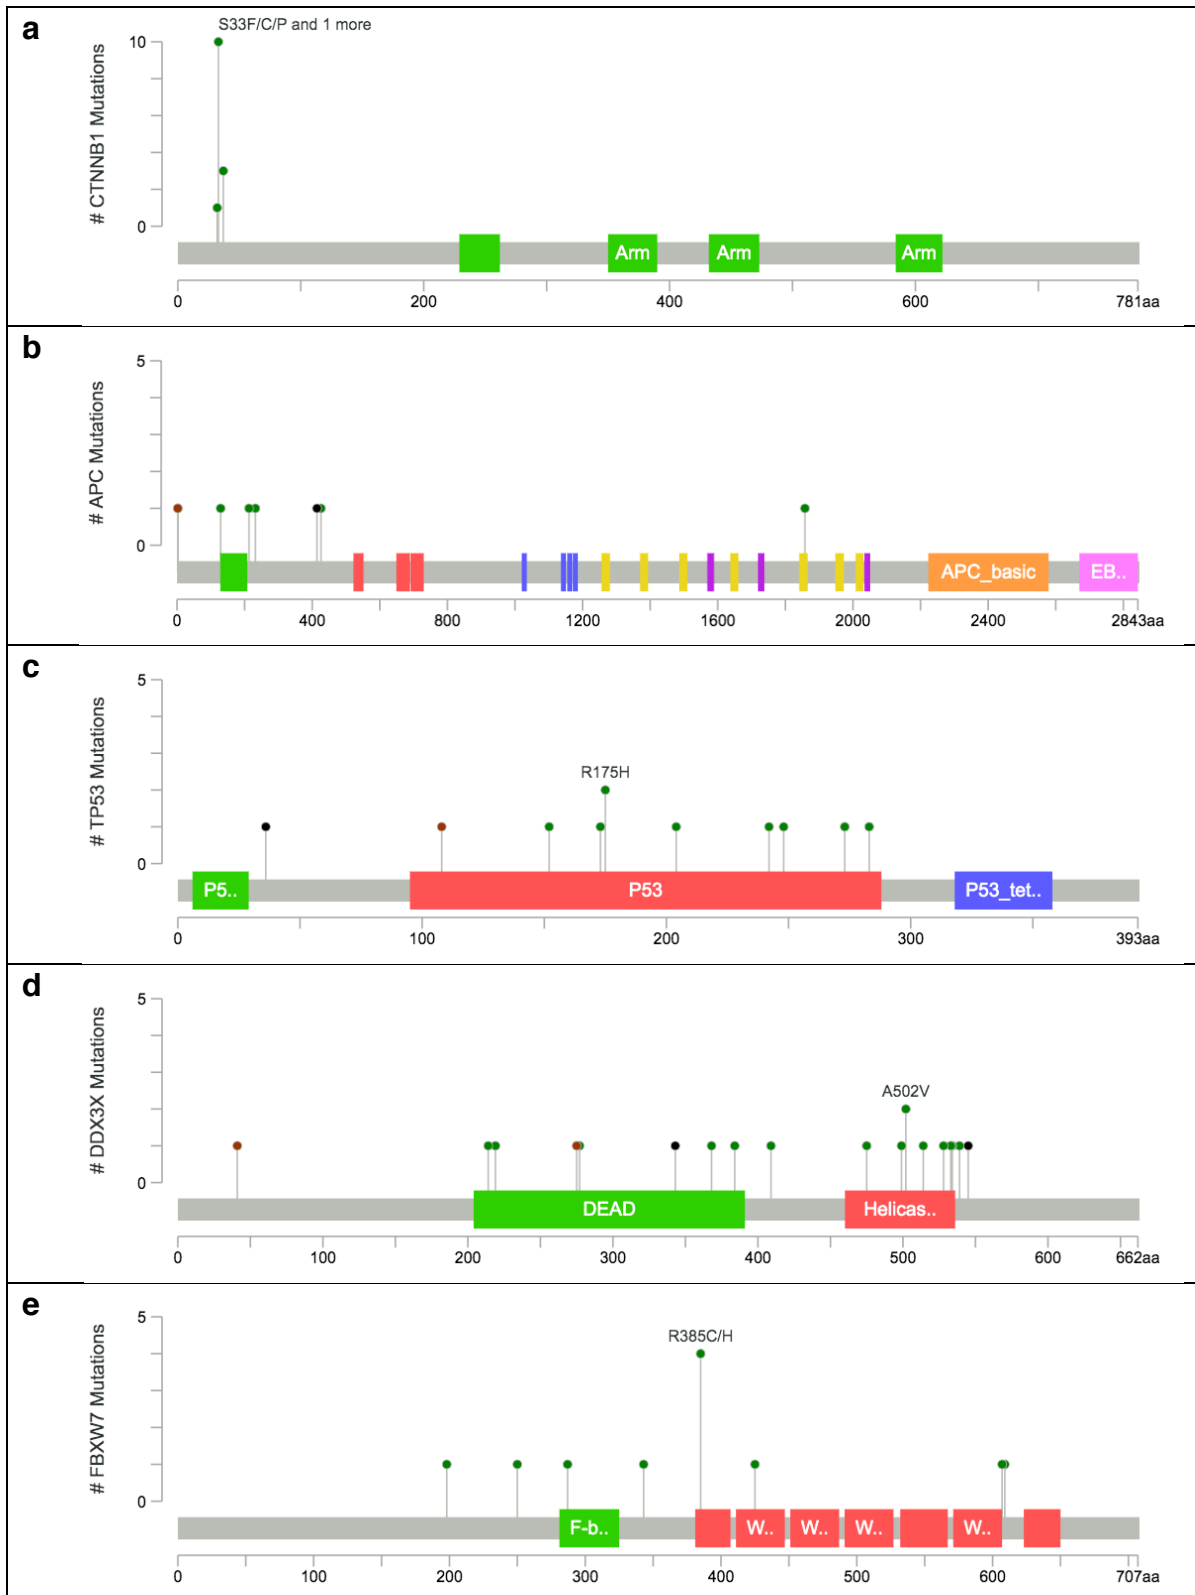



**Supplementary Figure 4 (continued).** Gene-level summary plots of mutations in **(a)** CTNNB1, **(b)** APC, **(c)** TP53, **(d)** DDX3X, **(e)** FBXW7, **(f)** PTCH1, **(g)** SMO, **(h)** KBTBD4, **(i)** NOTCH1 and **(j)** TCF4. Green, missense mutations; Brown: in-frame mutations; Black: truncating mutations

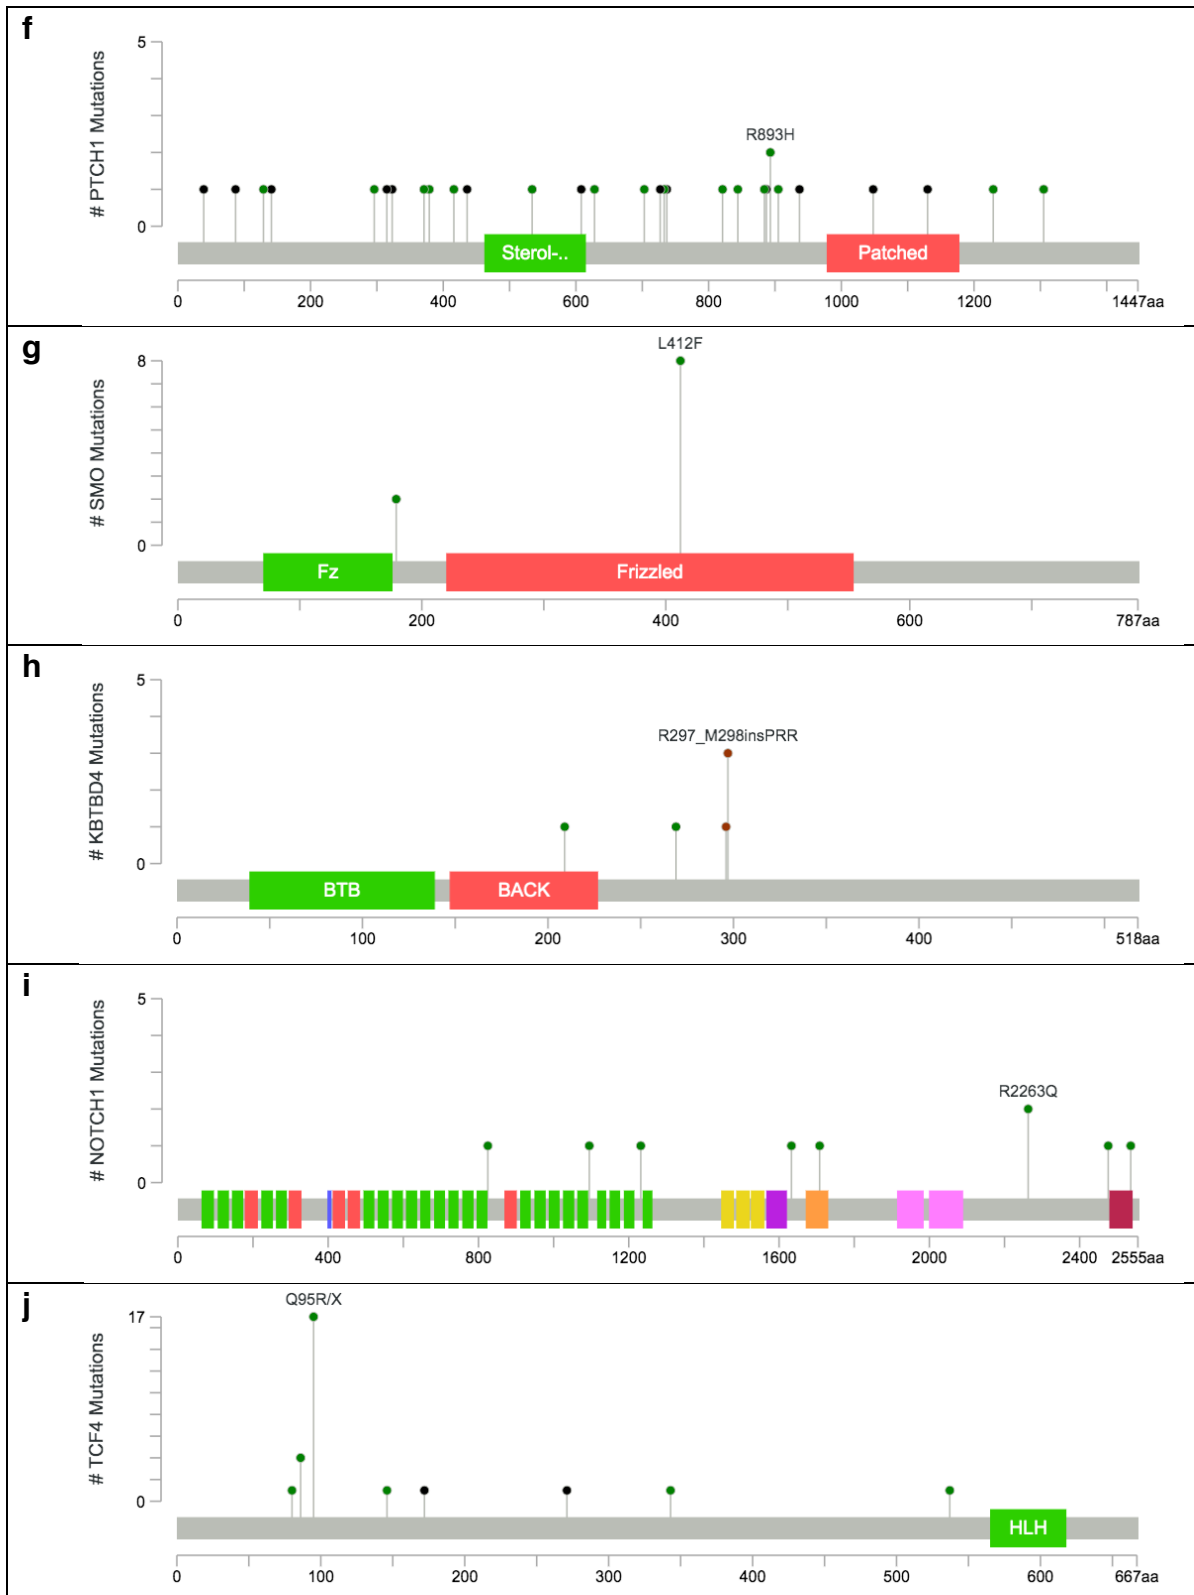

**Supplementary Figure 5.** Sanger sequencing chromatograms showing concurrent WNT and SHH pathway gene mutations in adult WNT medulloblastomas

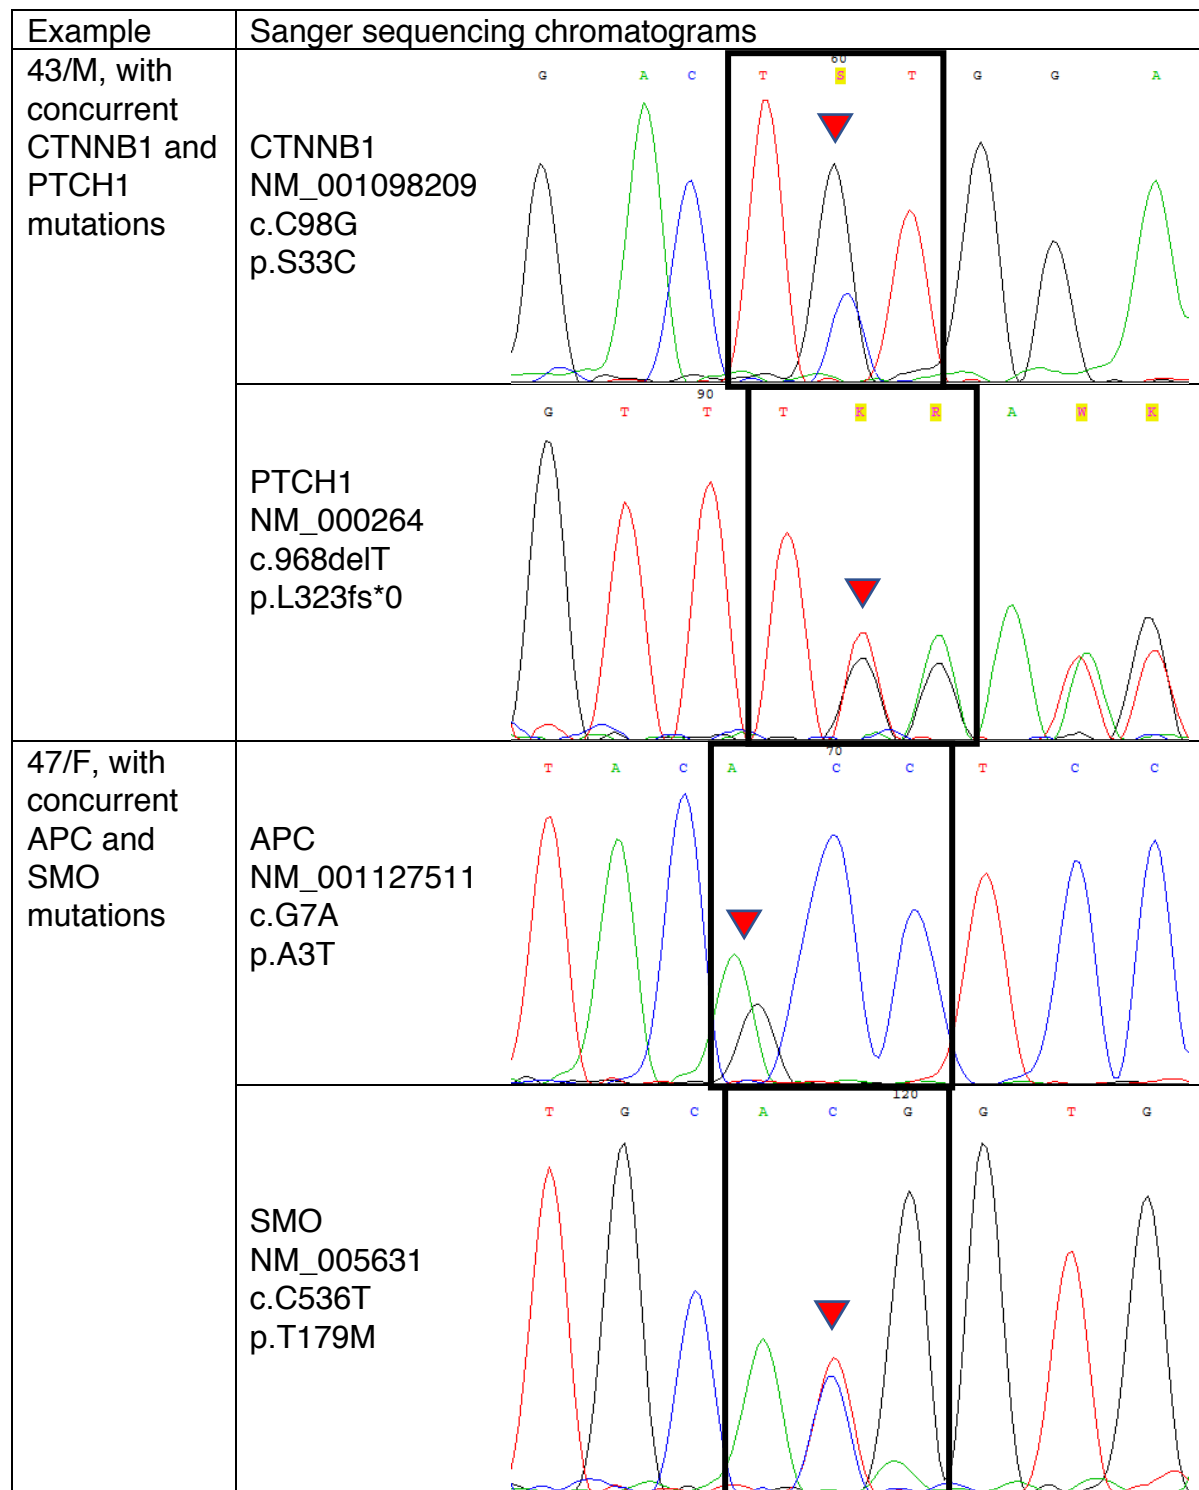





## Supplementary Figure 7. Oncoprint summary showing mutations in genes related to chromatin modification

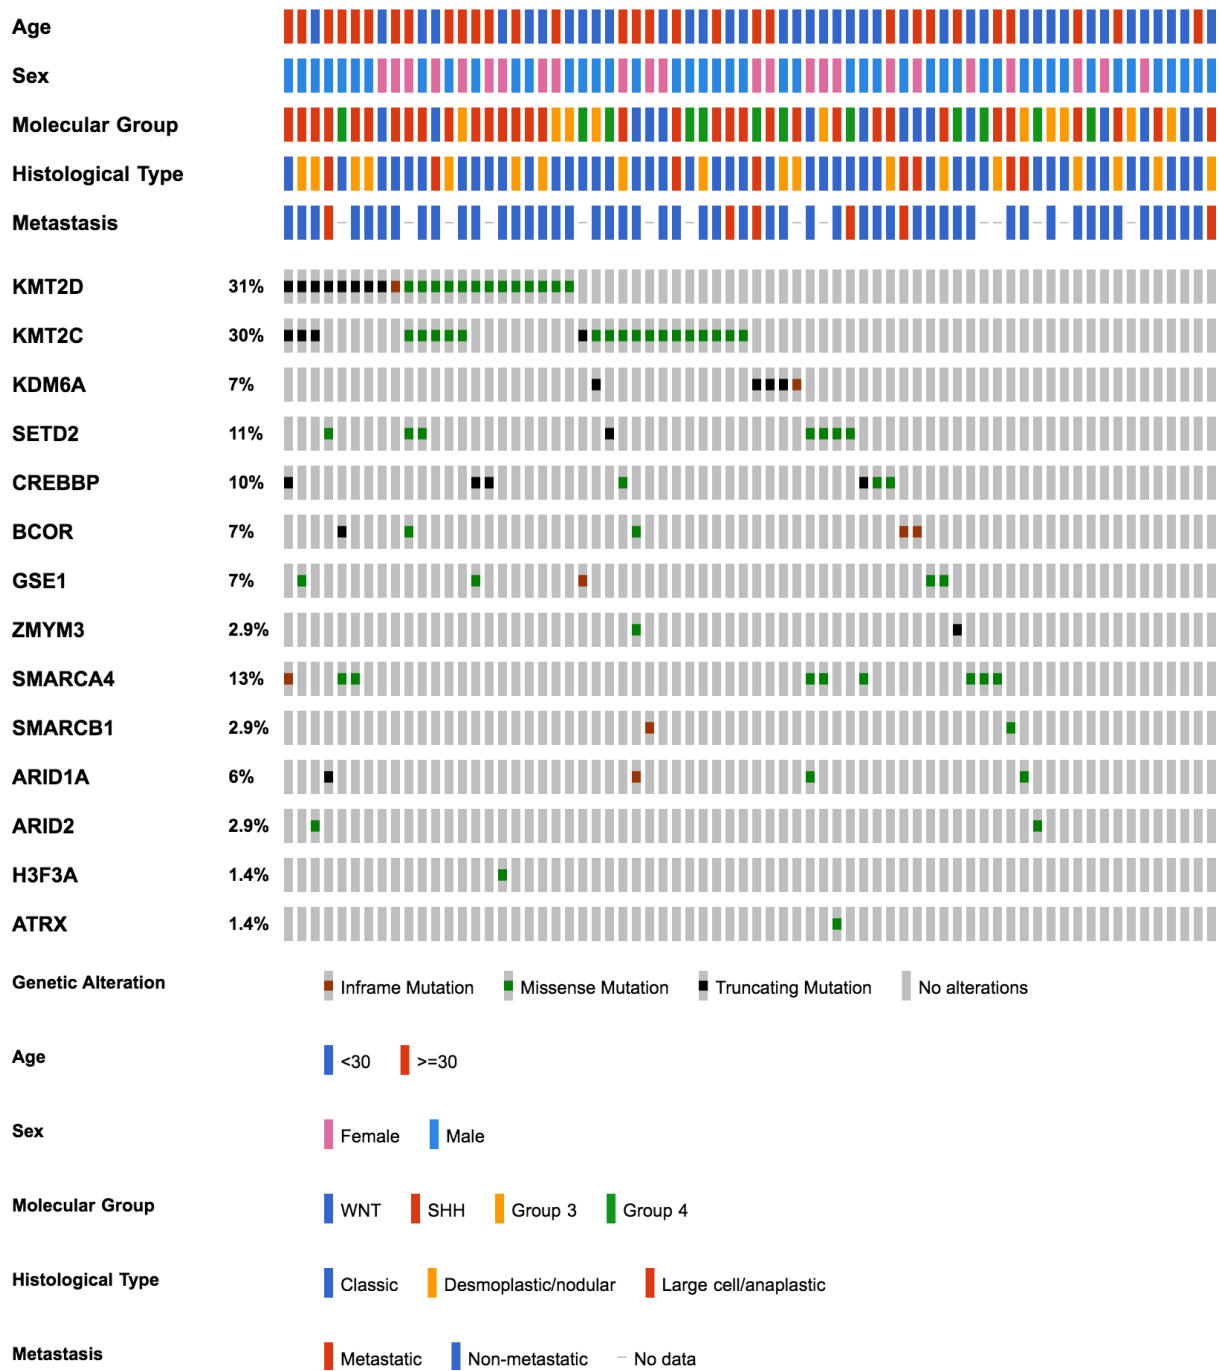

Supplement: MOESM1 [file 25667418]
